# Supplementary material
Source: Research Square preprint supplement (doi:10.21203/rs.3.rs-9794114/v1)
Supplement: Supplementary file 1 [file 8decc4ab9e0c7c50bb7f088b.docx]

**Supplemental materials**

**Supplemental table 1 Adverse event outcomes of the observations**

| Adverse events | Child cases | Child% | Adult cases | Adult % |
| --- | --- | --- | --- | --- |
| Died | 158 | 7.4% | 2,427 | 8.9% |
| Life Threatening | 208 | 9.7% | 2,092 | 7.7% |
| Disabled | 9 | 0.4% | 350 | 1.3% |
| Congenital Anomaly | 5 | 0.2% | 3 | 0.0% |
| Hospitalized | 1,283 | 60% | 16,306 | 59.9% |
| Required Intervention | 18 | 0.8% | 150 | 0.6% |
| Non-Serious | 41 | 1.9% | 873 | 3.2% |
| Other Outcomes | 416 | 19.5% | 5,010 | 18.4% |
| Notes: The total number of individual event observations for Children is equal to 2,138; the total number of individual event observations for adults is equal to 27,211. | | | | |

**Supplemental table 2 Top 25 drugs clinical indication and drugs more frequently associated with acute pancreatitis.**

| Child | Adult |
| --- | --- |

| Suspect Product  Active Ingredients | Clinical indication | Cases | % | Suspect Product  Active Ingredients | Clinical indication | Cases | % |
| --- | --- | --- | --- | --- | --- | --- | --- |
| Vincristine / Vincristine Sulfate | Acute Lymphocytic Leukaemia | 120 | 7.22% | Metformin Hydrochloride | Type 2 Diabetes Mellitus | 618 | 2.78% |
| Asparaginase | Acute Lymphocytic Leukaemia | 91 | 5.48% | Liraglutide | Type 2 Diabetes Mellitus | 543 | 2.45% |
| Pegaspargase | Acute Lymphocytic Leukaemia | 77 | 4.63% | Exenatide | Type 2 Diabetes Mellitus | 409 | 1.84% |
| Dexamethasone | Acute Lymphocytic Leukaemia | 73 | 4.39% | Sitagliptin Phosphate | Type 2 Diabetes Mellitus | 378 | 1.70% |
| Methotrexate | Acute Lymphocytic Leukaemia | 73 | 4.39% | Metformin Hydrochloride | Diabetes Mellitus | 359 | 1.62% |
| Mercaptopurine | Acute Lymphocytic Leukaemia | 47 | 2.83% | Hydrochlorothiazide | Hypertension | 341 | 1.54% |
| Cytarabine | Acute Lymphocytic Leukaemia | 42 | 2.53% | Didanosine | Hiv Infection | 286 | 1.29% |
| Prednisone | Acute Lymphocytic Leukaemia | 39 | 2.35% | Stavudine | Hiv Infection | 269 | 1.21% |
| Zidovudine | Hiv Infection | 37 | 2.23% | Lamivudine | Hiv Infection | 266 | 1.20% |
| Acetaminophen | Pain | 35 | 2.11% | Metformin Hydrochloride | Hypertension | 264 | 1.19% |
| Valproic Acid | Seizure | 35 | 2.11% | Acetaminophen | Pain | 244 | 1.10% |
| Lamivudine | Hiv Infection | 34 | 2.05% | Quetiapine Fumarate | Depression | 210 | 0.95% |
| Cyclophosphamide | Acute Lymphocytic Leukaemia | 32 | 1.93% | Nilotinib | Chronic Myeloid Leukaemia | 210 | 0.95% |
| Cyclosporine | Prophylaxis Against Graft Versus Host Disease | 31 | 1.87% | Sitagliptin Phosphate | Diabetes Mellitus | 206 | 0.93% |
| Mycophenolate Mofetil | Prophylaxis Against Graft Versus Host Disease | 26 | 1.56% | Ritonavir | Hiv Infection | 201 | 0.91% |
| Infliximab | Crohn's Disease | 26 | 1.56% | Dulaglutide | Type 2 Diabetes Mellitus | 189 | 0.85% |
| Valproic Acid | Epilepsy | 26 | 1.56% | Exenatide | Diabetes Mellitus | 180 | 0.81% |
| Tacrolimus | Immunosuppressant Drug Therapy | 25 | 1.50% | Ribavirin | Hepatitis C | 170 | 0.77% |
| Ritonavir | Hiv Infection | 25 | 1.50% | Semaglutide | Type 2 Diabetes Mellitus | 167 | 0.75% |
| Didanosine | Hiv Infection | 25 | 1.50% | Ramipril | Hypertension | 156 | 0.70% |
| Daunorubicin | Acute Lymphocytic Leukaemia | 24 | 1.44% | Amlodipine Besylate | Hypertension | 142 | 0.64% |
| Prednisolone | Acute Lymphocytic Leukaemia | 23 | 1.38% | Mesalamine | Colitis Ulcerative | 141 | 0.63% |
| Zidovudine | Antiviral Prophylaxis | 23 | 1.38% | Quetiapine Fumarate | Bipolar Disorder | 133 | 0.60% |
| Nevirapine | Hiv Infection | 22 | 1.32% | Lisinopril | Hypertension | 131 | 0.59% |
| Valproate Sodium | Epilepsy | 21 | 1.26% | Tenofovir Disoproxil Fumarate | Hiv Infection | 131 | 0.59% |
| Notes: The total number of observations for Children where the ‘Reason for Use’ is known is equal to 1,662 (we filter out 476 observations of the 2,138); the total number of observations for adults where the ‘Reason for Use’ is known is equal to 22,205 (we filter out 5,006 observations of the 27,211) | | | | | | | |

**Supplemental Table 3 Therapeutic Categories and ATC level of the 7 drugs in common between children and adults in the top 25 of drugs associated with acute pancreatitis.**

Therapeutic categories and Anatomical Therapeutic Classification (ATC) level 1 information for the product active ingredients shared across the top 25 in children and adults were ordered by ROR.

| Generic Name | Therapeutic Categories | ATC level 1 |
| --- | --- | --- |
| Dexamethasone | - Anti-Inflammatory Agents - Corticosteroids | R — RESPIRATORY SYSTEM  D — DERMATOLOGICALS  S — SENSORY ORGANS  C — CARDIOVASCULAR SYSTEM  H — SYSTEMIC HORMONAL PREPARATIONS, EXCL. SEX HORMONES AND INSULINS  A — ALIMENTARY TRACT AND METABOLISM |
| Prednisone | Corticosteroids | A — ALIMENTARY TRACT AND METABOLISM  H — SYSTEMIC HORMONAL PREPARATIONS, EXCL. SEX HORMONES AND INSULINS |
| Tacrolimus | - Calcineurin Inhibitor Immunosuppressant - Immunosuppressive Agents | D — DERMATOLOGICALS  L — ANTINEOPLASTIC AND IMMUNOMODULATING AGENTS |
| Acetaminophen | Analgesics | N — NERVOUS SYSTEM |
| Furosemide | - Antihypertensive Agents Indicated for Hypertension - Diuretics - Sodium Potassium Chloride Symporter Inhibitors | C — CARDIOVASCULAR SYSTEM  G — GENITO URINARY SYSTEM AND SEX HORMONES |
| Lamivudine | - Hepatitis B Virus Nucleoside Analog Reverse Transcriptase Inhibitor - Human Immunodeficiency Virus Nucleoside Analog Reverse Transcriptase Inhibitor - Nucleoside and Nucleotide Reverse Transcriptase Inhibitors | J — ANTIINFECTIVES FOR SYSTEMIC USE |
| Didanosine | - Human Immunodeficiency Virus Nucleoside Analog Reverse Transcriptase Inhibitor - Nucleoside and Nucleotide Reverse Transcriptase Inhibitors | J — ANTIINFECTIVES FOR SYSTEMIC USE |
| Notes: The table shows therapeutic categories and Anatomical Therapeutic Classification (ATC) level 1 information of the 7 Suspect Product Active Ingredients for child and adult cases in common, ordered by the ROR as calculated in *Table 4.*  The therapeutic categories and ATC-level 1 information is sourced from the Drug Bank database (https://go.drugbank.com/). | | |

**Supplemental Table 4 Outcome Seriousness by Paediatric Class - Suspect Product Active Ingredients Top 25**

| Suspect Product  Active Ingredient | Newborn Infants  0-27 days | Infants and Toddlers  28 days - 23 months | Children  2-11 years | Adolescents  12-17 years | Adults |
| --- | --- | --- | --- | --- | --- |
| Asparaginase |  | 100% (3/3) | 57.35% (39/68) | 70.89% (56/79) | 78.43% (40/51) |
| Pegaspargase |  | 83.33% (15/18) | 88.73% (63/71) | 89.47% (68/76) | 83.82% (57/68) |
| Daunorubicin |  | 70% (7/10) | 85.71% (6/7) | 73.53% (25/34) | 80.77% (21/26) |
| Vincristine/Vincristine Sulfate |  |  | 60% (3/5) | 66.67% (2/3) | 66.67% (2/3) |
| Mercaptopurine |  | 100% (3/3) | 90.57% (48/53) | 82.14% (46/56) | 86.75% (72/83) |
| Cytarabine |  | 66.67% (6/9) | 82.98% (39/47) | 78.18% (43/55) | 75.86% (88/116) |
| Methotrexate |  | 76.92% (10/13) | 76.62% (59/77) | 78.26% (72/92) | 86.5% (205/237) |
| Cyclosporine |  | 66.67% (4/6) | 80.65% (50/62) | 70.83% (17/24) | 78.75% (126/160) |
| Valproic Acid |  | 50% (3/6) | 87.14% (61/70) | 87.5% (28/32) | 88.54% (170/192) |
| Dexamethasone |  | 100% (12/12) | 89.55% (60/67) | 85.19% (46/54) | 84.28% (268/318) |
| Cyclophosphamide |  | 50% (3/6) | 89.74% (35/39) | 84.21% (48/57) | 87.85% (217/247) |
| Trimethoprim | 100% (9/9) | 100% (3/3) | 87.84% (65/74) | 85% (17/20) | 90.69% (263/290) |
| Sulfamethoxazole | 100% (9/9) | 100% (3/3) | 87.84% (65/74) | 85% (17/20) | 90.03% (271/301) |
| Zidovudine | 95.65% (44/46) | 100% (13/13) | 27.27% (3/11) | 0% (0/1) | 59.45% (129/217) |
| Prednisone |  | 100% (18/18) | 77.36% (41/53) | 68.63% (35/51) | 88.34% (356/403) |
| Infliximab |  |  | 81.82% (9/11) | 80.49% (33/41) | 74.43% (131/176) |
| Divalproex Sodium |  | 100% (1/1) | 78.57% (22/28) | 72.97% (27/37) | 79.02% (177/224) |
| Prednisolone |  | 25% (1/4) | 67.57% (25/37) | 82.35% (28/34) | 85.17% (247/290) |
| Tacrolimus |  | 100% (4/4) | 68.52% (37/54) | 77.14% (27/35) | 86.93% (326/375) |
| Mycophenolate Mofetil |  | 100% (3/3) | 82.05% (32/39) | 33.33% (5/15) | 84.85% (224/264) |
| Acetaminophen |  | 100% (1/1) | 84.13% (53/63) | 96.88% (62/64) | 92.81% (749/807) |
| Furosemide |  |  | 75% (36/48) | 83.33% (5/6) | 88.56% (333/376) |
| Lamivudine | 100% (32/32) | 100% (9/9) | 53.85% (7/13) | 0% (0/4) | 78.16% (322/412) |
| Didanosine | 95.24% (20/21) | 85.71% (6/7) | 84.62% (22/26) | 33.33% (1/3) | 73.41% (334/455) |
| Levetiracetam |  | 100% (1/1) | 85.71% (24/28) | 57.14% (12/21) | 83.2% (104/125) |
| Notes:  * This table presents the case rates of serious outcomes split by Paediatric Age and Suspect product Active Ingredient, given in percentages and in absolute ratio (in brackets). A serious outcome is defined as a reported adverse outcome of a patient including any of the following: “Death”, “Life Threatening”, “Hospitalized”, “Disabled”, and “Congenital Anomaly”. | | | | | |

**Supplemental Table 5 Prophylaxis: Top 20 indications (covering 71.14%)**

| Clinical indication | Total cases |
| --- | --- |
| Hypertension | 421 |
| Prophylaxis Against Gastrointestinal Ulcer | 202 |
| Pain | 289 |
| Thrombosis Prophylaxis | 153 |
| Type 2 Diabetes Mellitus|Diabetes Mellitus | 249 |
| Cardiovascular Event Prophylaxis | 118 |
| Prophylaxis Of Nausea And Vomiting | 113 |
| Hypercholesterolaemia | 108 |
| Dyslipidaemia | 91 |
| Gastrooesophageal Reflux Disease | 88 |
| Antiviral Prophylaxis | 88 |
| Insomnia | 86 |
| Hypothyroidism | 87 |
| Prophylaxis Against Graft Versus Host Disease | 79 |
| Constipation | 87 |
| Hiv Infection | 98 |
| Prophylaxis Against Transplant Rejection | 73 |
| Antibiotic Prophylaxis | 73 |
| Depression | 74 |
| Antifungal Prophylaxis | 67 |

**Supplemental Table 6 Multivariate analysis**

**Supplemental Table 6.1 Outcome Seriousness of Dexamethasone in Interaction with Child Cases**

|  | (1) | (2) | (3) | (4) |
| --- | --- | --- | --- | --- |
| Dependent Variable: | Serious  Outcome | Serious  Outcome | Serious  Outcome | Serious  Outcome |
| Constant | 1.511*** (0.1161) | 1.522*** (0.1125) | 1.529*** (0.1145) |  |
| Suspect Product Active Ingredient: **Dexamethasone** | 0.4103. (0.2446) | 0.4480. (0.2533) | 0.1973 (0.2726) | 0.1650 (0.1544) |
| Patient Age < 18 (Child case) |  | -0.1337** (0.0503) | -0.2083*** (0.0398) | -0.1052 (0.0657) |
| **Dexamethasone x**  **Patient Age < 18 (Child case)** |  |  | 0.8599*** (0.0874) | 0.7433*** (0.0505) |
| Fixed effects | No | No | No | Reporter Type  Patient Sex  Reporting Country |
| S.E.: Clustered | Reporter Type | Reporter Type | Reporter Type | Reporter Type |
| Observations | 63,329 | 63,329 | 63,329 | 62,371 |
| Pseudo R2 | 0.00096 | 0.00119 | 0.00193 | 0.05874 |
| BIC | 59,356.7 | 59,354.2 | 59,321.1 | 55,515.2 |
| Notes: This table presents the results of the multivariate logistic regression results where the outcome seriousness (1 if a serious outcome is observed, 0 otherwise) is estimated as a function of the presence of the relevant Suspect Product Active Ingredient, a binary indicator for whether the patient age is lower than 18 (Child case), and an interaction effect between the Suspect Product Active Ingredient and the binary patient age indicator.  Standard errors are given between parentheses, ***, **, *, represent significance levels of 0.001, 0.01, 0.05, and 0.1 respectively. | | | | |

**Supplemental Table 6.2 Outcome Seriousness of Acetaminophen in Interaction with Child Cases**

|  | (1) | (2) | (3) | (4) |
| --- | --- | --- | --- | --- |
| Dependent Variable: | Serious  Outcome | Serious  Outcome | Serious  Outcome | Serious  Outcome |
| Constant | 1.476*** (0.1038) | 1.486*** (0.1018) | 1.481*** (0.1066) |  |
| Suspect Product Active Ingredient: **Acetaminophen** | 0.7864*** (0.0439) | 0.7937*** (0.0391) | 0.9165*** (0.1538) | 0.4492*** (0.1092) |
| Patient Age < 18 (Child case) |  | -0.1138* (0.0496) | -0.0554 (0.0666) | -0.0347 (0.0577) |
| **Acetaminophen x**  **Patient Age < 18 (Child case)** |  |  | -0.6604 (0.6421) | 0.1157 (0.5051) |
| Fixed effects | No | No | No | Reporter Type  Patient Sex  Reporting Country |
| S.E.: Clustered | Reporter Type | Reporter Type | Reporter Type | Reporter Type |
| Observations | 63,329 | 63,329 | 63,329 | 62,371 |
| Pseudo R2 | 0.00539 | 0.00556 | 0.00605 | 0.05908 |
| BIC | 59,093.5 | 59,094.4 | 59,076.3 | 55,495.7 |
| Notes: This table presents the results of the multivariate logistic regression results where the outcome seriousness (1 if a serious outcome is observed, 0 otherwise) is estimated as a function of the presence of the relevant Suspect Product Active Ingredient, a binary indicator for whether the patient age is lower than 18 (Child case), and an interaction effect between the Suspect Product Active Ingredient and the binary patient age indicator.  Standard errors are given between parentheses, ***, **, *, represent significance levels of 0.001, 0.01, 0.05, and 0.1 respectively. | | | | |

**Supplemental Table 6.3 Outcome Seriousness of Prednisone in Interaction with Child Cases**

|  | (1) | (2) | (3) | (4) |
| --- | --- | --- | --- | --- |
| Dependent Variable: | Serious  Outcome | Serious  Outcome | Serious  Outcome | Serious  Outcome |
| Constant | 1.503*** (0.1116) | 1.514*** (0.1092) | 1.510*** (0.1118) |  |
| Suspect Product Active Ingredient: **Prednisone** | 0.6304*** (0.1499) | 0.6526*** (0.1556) | 0.8372** (0.2716) | 0.8326*** (0.1979) |
| Patient Age < 18 (Child case) |  | -0.1270*** (0.0367) | -0.0792*** (0.0051) | -0.0073 (0.0269) |
| **Prednisone x**  **Patient Age < 18 (Child case)** |  |  | -0.6167 (0.4437) | -0.6215 (0.4321) |
| Fixed effects | No | No | No | Reporter Type  Patient Sex  Reporting Country |
| S.E.: Clustered | Reporter Type | Reporter Type | Reporter Type | Reporter Type |
| Observations | 63,329 | 63,329 | 63,329 | 62,371 |
| Pseudo R2 | 0.00215 | 0.00236 | 0.00273 | 0.06001 |
| BIC | 59,286.0 | 59,284.6 | 59,273.7 | 55,441.4 |
| Notes: This table presents the results of the multivariate logistic regression results where the outcome seriousness (1 if a serious outcome is observed, 0 otherwise) is estimated as a function of the presence of the relevant Suspect Product Active Ingredient, a binary indicator for whether the patient age is lower than 18 (Child case), and an interaction effect between the Suspect Product Active Ingredient and the binary patient age indicator.  Standard errors are given between parentheses, ***, **, *, represent significance levels of 0.001, 0.01, 0.05, and 0.1 respectively. | | | | |

**Supplemental Table 6.4 Outcome Seriousness of Tacrolimus in Interaction with Child Cases**

|  | (1) | (2) | (3) | (4) |
| --- | --- | --- | --- | --- |
| Dependent Variable: | Serious  Outcome | Serious  Outcome | Serious  Outcome | Serious  Outcome |
| Constant | 1.524*** (0.1108) | 1.531*** (0.1085) | 1.525*** (0.1080) |  |
| Suspect Product Active Ingredient: **Tacrolimus** | 0.1073. (0.0557) | 0.1175* (0.0581) | 0.4129*** (0.1190) | 0.3934*** (0.0488) |
| Patient Age < 18 (Child case) |  | -0.0822. (0.0425) | -0.0051 (0.0425) | 0.0297 (0.0669) |
| **Tacrolimus x**  **Patient Age < 18 (Child case)** |  |  | -1.110*** (0.1690) | -0.6245*** (0.0991) |
| Fixed effects | No | No | No | Reporter Type  Patient Sex  Reporting Country |
| S.E.: Clustered | Reporter Type | Reporter Type | Reporter Type | Reporter Type |
| Observations | 63,329 | 63,329 | 63,329 | 62,371 |
| Pseudo R2 | 0.0000537 | 0.00014 | 0.00124 | 0.05815 |
| BIC | 59,410.5 | 59,416.2 | 59,361.9 | 55,549.2 |
| Notes: This table presents the results of the multivariate logistic regression results where the outcome seriousness (1 if a serious outcome is observed, 0 otherwise) is estimated as a function of the presence of the relevant Suspect Product Active Ingredient, a binary indicator for whether the patient age is lower than 18 (Child case), and an interaction effect between the Suspect Product Active Ingredient and the binary patient age indicator.  Standard errors are given between parentheses, ***, **, *, represent significance levels of 0.001, 0.01, 0.05, and 0.1 respectively. | | | | |

**Supplemental Table 6.5 Outcome Seriousness of Lamivudine in Interaction with Child Cases**

|  | (1) | (2) | (3) | (4) |
| --- | --- | --- | --- | --- |
| Dependent Variable: | Serious  Outcome | Serious  Outcome | Serious  Outcome | Serious  Outcome |
| Constant | 1.527*** (0.1088) | 1.534*** (0.1068) | 1.536*** (0.1041) |  |
| Suspect Product Active Ingredient: **Lamivudine** | 0.0091 (0.0418) | 0.0128 (0.0393) | -0.0587 (0.1064) | 0.0272 (0.2429) |
| Patient Age < 18 (Child case) |  | -0.0772. (0.0402) | -0.1005. (0.0555) | -0.0169 (0.0835) |
| **Lamivudine x**  **Patient Age < 18 (Child case)** |  |  | 0.5934 (0.7264) | 0.4157 (0.9661) |
| Fixed effects | No | No | No | Reporter Type  Patient Sex  Reporting Country |
| S.E.: Clustered | Reporter Type | Reporter Type | Reporter Type | Reporter Type |
| Observations | 63,329 | 63,329 | 63,329 | 62,371 |
| Pseudo R2 | 0.000000403 | 0.0000801 | 0.00025 | 0.05771 |
| BIC | 59,413.7 | 59,420.0 | 59,420.9 | 55,575.0 |
| Notes:  *This table presents the results of the multivariate logistic regression results where the outcome seriousness (1 if a serious outcome is observed, 0 otherwise) is estimated as a function of the presence of the relevant Suspect Product Active Ingredient, a binary indicator for whether the patient age is lower than 18 (Child case), and an interaction effect between the Suspect Product Active Ingredient and the binary patient age indicator.  ** Standard errors are given between parentheses, ***, **, *, represent significance levels of 0.001, 0.01, 0.05, and 0.1 respectively. | | | | |

**Supplemental Table 6.6 Outcome Seriousness of Didanosine in Interaction with Child Cases**

|  | (1) | (2) | (3) | (4) |
| --- | --- | --- | --- | --- |
| Dependent Variable: | Serious  Outcome | Serious  Outcome | Serious  Outcome | Serious  Outcome |
| Constant | 1.531*** (0.1065) | 1.538*** (0.1045) | 1.542*** (0.1033) |  |
| Suspect Product Active Ingredient: **Didanosine** | -0.1167 (0.1634) | -0.1137 (0.1628) | -0.2344 (0.1847) | -0.1126 (0.2977) |
| Patient Age < 18 (Child case) |  | -0.0754. (0.0418) | -0.1137* (0.0443) | -0.0325 (0.0701) |
| **Didanosine x**  **Patient Age < 18 (Child case)** |  |  | 1.247*** (0.3335) | 1.467*** (0.4101) |
| Fixed effects | No | No | No | Reporter Type  Patient Sex  Reporting Country |
| S.E.: Clustered | Reporter Type | Reporter Type | Reporter Type | Reporter Type |
| Observations | 63,329 | 63,329 | 63,329 | 62,371 |
| Pseudo R2 | 0.0000619 | 0.00014 | 0.00069 | 0.05804 |
| BIC | 59,410.0 | 59,416.6 | 59,394.6 | 55,555.9 |
| Notes: This table presents the results of the multivariate logistic regression results where the outcome seriousness (1 if a serious outcome is observed, 0 otherwise) is estimated as a function of the presence of the relevant Suspect Product Active Ingredient, a binary indicator for whether the patient age is lower than 18 (Child case), and an interaction effect between the Suspect Product Active Ingredient and the binary patient age indicator.  Standard errors are given between parentheses, ***, **, *, represent significance levels of 0.001, 0.01, 0.05, and 0.1 respectively. | | | | |

**Supplemental Table 6.7 Outcome Seriousness of Furosemide in Interaction with Child Cases**

|  | (1) | (2) | (3) | (4) |
| --- | --- | --- | --- | --- |
| Dependent Variable: | Serious  Outcome | Serious  Outcome | Serious  Outcome | Serious  Outcome |
| Constant | 1.511*** (0.1054) | 1.519*** (0.1032) | 1.514*** (0.1063) |  |
| Suspect Product Active Ingredient: **Furosemide** | 0.4491*** (0.0860) | 0.4546*** (0.0822) | 0.6422*** (0.0529) | 0.3087*** (0.0288) |
| Patient Age < 18 (Child case) |  | -0.0888* (0.0431) | -0.0326 (0.0387) | -0.0129 (0.0564) |
| **Furosemide x**  **Patient Age < 18 (Child case)** |  |  | -0.9477* (0.4699) | 0.0032 (0.3071) |
| Fixed effects | No | No | No | Reporter Type  Patient Sex  Reporting Country |
| S.E.: Clustered | Reporter Type | Reporter Type | Reporter Type | Reporter Type |
| Observations | 63,329 | 63,329 | 63,329 | 62,371 |
| Pseudo R2 | 0.00108 | 0.00118 | 0.00189 | 0.05803 |
| BIC | 59,349.7 | 59,354.5 | 59,323.4 | 55,556.7 |
| Notes: This table presents the results of the multivariate logistic regression results where the outcome seriousness (1 if a serious outcome is observed, 0 otherwise) is estimated as a function of the presence of the relevant Suspect Product Active Ingredient, a binary indicator for whether the patient age is lower than 18 (Child case), and an interaction effect between the Suspect Product Active Ingredient and the binary patient age indicator.  Standard errors are given between parentheses, ***, **, *, represent significance levels of 0.001, 0.01, 0.05, and 0.1 respectively. | | | | |
